# Adaptive Evolution of Cooperation through Darwinian Dynamics in Public Goods Games

Kuiying Deng<sup>1,2\*</sup>, Tianguang Chu<sup>1,3\*</sup>

**1** State Key Laboratory for Turbulence and Complex Systems, College of Engineering, Peking University, Beijing, China, **2** Department of Mathematics, Uppsala University, Uppsala, Sweden, **3** Key Laboratory of Machine Perception (Ministry of Education), Peking University, Beijing, China

## Abstract

The linear or threshold Public Goods game (PGG) is extensively accepted as a paradigmatic model to approach the evolution of cooperation in social dilemmas. Here we explore the significant effect of nonlinearity of the structures of public goods on the evolution of cooperation within the well-mixed population by adopting Darwinian dynamics, which simultaneously consider the evolution of populations and strategies on a continuous adaptive landscape, and extend the concept of evolutionarily stable strategy (ESS) as a coalition of strategies that is both convergent-stable and resistant to invasion. Results show (i) that in the linear PGG contributing nothing is an ESS, which contradicts experimental data, (ii) that in the threshold PGG contributing the threshold value is a fragile ESS, which cannot resist the invasion of contributing nothing, and (iii) that there exists a robust ESS of contributing more than half in the sigmoid PGG if the return rate is relatively high. This work reveals the significant effect of the nonlinearity of the structures of public goods on the evolution of cooperation, and suggests that, compared with the linear or threshold PGG, the sigmoid PGG might be a more proper model for the evolution of cooperation within the well-mixed population.

**Citation:** Deng K, Chu T (2011) Adaptive Evolution of Cooperation through Darwinian Dynamics in Public Goods Games. PLoS ONE 6(10): e25496. doi:10.1371/journal.pone.0025496

**Editor:** Attila Szolnoki, Hungarian Academy of Sciences, Hungary

**Received:** July 18, 2011; **Accepted:** September 5, 2011; **Published:** October 25, 2011

**Copyright:** © 2011 Deng, Chu. This is an open-access article distributed under the terms of the Creative Commons Attribution License, which permits unrestricted use, distribution, and reproduction in any medium, provided the original author and source are credited.

**Funding:** This work was supported by the National Natural Science Foundation of China under grant Nos. 60974064 and 60736022 (<http://www.nsf.gov.cn/Portal0/default124.htm>). K. Deng acknowledges the support from a scholarship within the Erasmus Mundus External Cooperation Window LISUM project (<http://www.lisum.ugent.be/index.asp>). The funders had no role in study design, data collection and analysis, decision to publish, or preparation of the manuscript.

**Competing Interests:** The authors have declared that no competing interests exist.

\* E-mail: RossDeng@pku.edu.cn (KD); chutg@pku.edu.cn (TC)

## Introduction

The evolution of cooperation in social dilemmas has attracted broad interests across disciplines [1–5]. Social dilemmas are situations in which individual rationality leads to collective irrationality [6,7]. They are pervasive in all kinds of relationships, from the interpersonal to the international. For example, a public local library financed through donations benefits all people in the community. One can benefit most if he donates nothing. However, if everyone reasoned like this, the library would not keep running due to the lack of finance, and all people would be worst off [8]. This is a Public Goods dilemma. There exists another kind of social dilemma called commons dilemma. For example, farmers living in a common grassland can benefit more by raising as many cattle as they want. However, if every farmer reasoned like this, the grassland would be depleted very soon, and all farmers would worst off [6]. The same reasoning applies to these two kinds of social dilemmas, so we focus on the Public Goods dilemma, which is usually modeled as a *Public Goods game* (PGG).

In a traditional PGG experiment, some subjects form a group. Each subject is endowed with a certain amount of money, and they have to decide how much to invest in the public project, which is increased to a multiple of it and then split evenly among all subjects. So the gains of the subjects consist of two parts: the money left that they do not invest and the money gained from investing in the public project. For example, each of a four-member group is given 20 money units (MUs), and the money invested in the public project is doubled. If all members invest 20

MUs, everyone will have 40 MUs. However, every invested MU only returns a half, and thus all members have an incentive to keep all money in pocket. If you defect by investing zero while every other member invests 20 MUs, you will have 50 MUs while other members 30 MUs per person. If all members defect, everyone ends up with 20 MUs and the benefit of the public project is forgone. Consequently a dilemma arises. Since every invested MU returns a half, from now on we call it a *linear* PGG, instead (Fig. 1).

In the linear PGG, investing nothing is the only equilibrium. That is, no one can gain more by investing more than zero no matter how much others invest. However, whether in linear PGG experiments or in real life, people often invest more than zero [9]. To better understanding people's behaviors, the *threshold* PGG is extensively researched (Fig. 1). In the threshold PGG, there exists a provision point or threshold value. If the total sum of the contributions is less than it, all contributions are lost, whereas if the total sum exceeds it, a fixed amount of the public good is gained. In contrast to the linear PGG, the threshold PGG has other equilibria except investing nothing. That is, any combination of contributions that sum to the provision point is an equilibrium. For example, each of a four-member group is given 20 MUs, and when the money invested in the public project reached 60 MUs every member is given extra 40 MUs. Then every member invests 15 MUs is an equilibrium. Three investing 20 MUs and one investing zero is another equilibrium. A threshold PGG is a dilemma with a coordination game embedded in it [8].

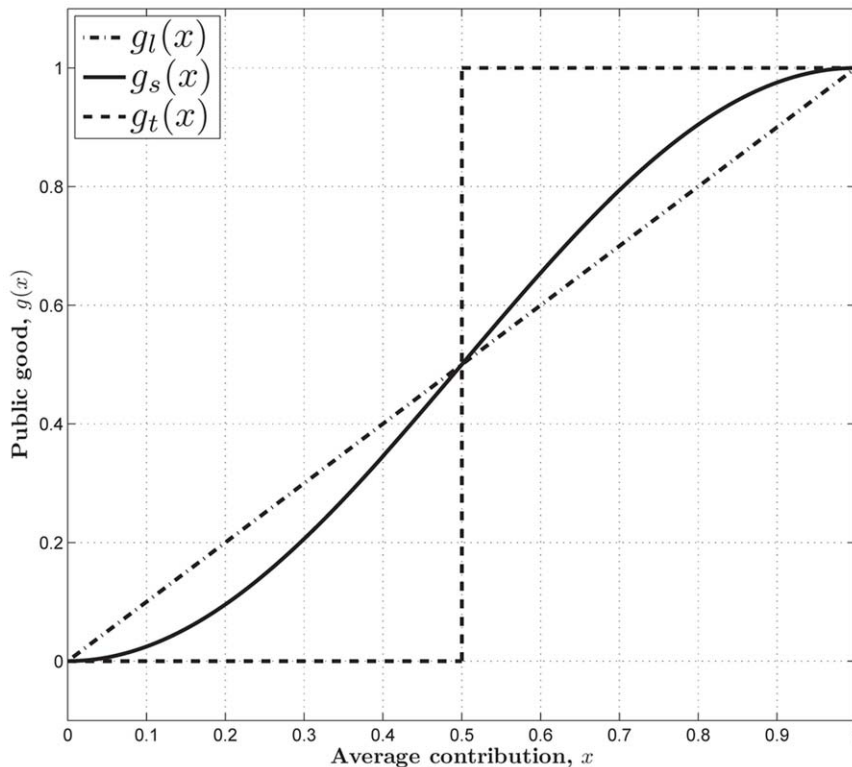

**Figure 1. The three kinds of structures of the PGG. (Dash-dot)** The linear PGG,  $g_l(x)=x$ . **(Solid)** The sigmoid PGG,  $g_s(x)=\sin^2(\pi x/2)$ . **(Dashed)** The threshold PGG,  $g_t(x)=0$  if  $0 \leq x < 1/2$ , and  $1$  if  $1/2 \leq x \leq 1$ . doi:10.1371/journal.pone.0025496.g001

However, most of social dilemmas in the real world are not with an obvious or clearly defined provision point. For example, in order to establish and maintain a public local library, those initial donations are important. Once the library starts to run, extra donations are also important for keep it running smoothly. But they are not as important as those that finally make possible the establishment of the library. Therefore, a tilted S-shaped continuous function such as a sigmoid function may provide a better model of many social dilemmas [8,10–12]. We refer to a PGG with this kind of structure as a *sigmoid* PGG (Fig. 1). As pointed out in [11], the linear or threshold PGG is a simplification, or rather an extreme version of the sigmoid PGG.

So far, there have been very few efforts made to directly explore the effect of nonlinearity of the structures of public goods on the evolution of cooperation. In [10], a rather simple model was employed to independently analyze the accelerating, linear, and decelerating portions of the S-shaped function, so that the complexity of directly dealing with the S-shaped function itself was circumvented. In [12], the authors concluded by adopting replicator dynamics that the threshold PGG (therein is called the Volunteer's Dilemma) is a good approximation of any public goods games in which the public good is a nonlinear function of the number of cooperators (see further comparison to our analysis in section Results and Discussion). Here we will apply Darwinian dynamics [4,13–16] to analyze the evolutionarily stable strategies (ESS) of these three kinds of PGGs, and try to show that the sigmoid PGG is really a more proper model for the evolution of cooperation within the well-mixed population, compared with the linear or

threshold PGG in that it can reinforce our understanding of people's behaviors in the real world.

## Analysis

The pioneering definition of ESS, which is originated by Maynard Smith and Price, refers to a strategy that, when common, can resist the invasion of a minority of any other strategy [17]. Resistance to invasion is a static concept, since it says nothing about what would happen if the population starts at (or is perturbed to) a nearby point [15]. Therefore, an ESS which does not require convergence stability may be unattainable through strategy dynamics by natural selection. This leads to the proliferation of related terminology such as evolutionarily unbeatable strategy,  $\delta$ -stability, internal stability, and evolutionarily singular strategy [18].

In contrast, Darwinian dynamics use a fitness-generating function ( $G$ -function) approach to continuous-trait evolutionary games [13,14]. The  $G$ -function allows for simultaneous consideration of population dynamics and strategy dynamics. An ESS is redefined as a coalition of strategies that is both convergent-stable and resistant to invasion, which is a natural extension of the original definition of Maynard Smith and Price. Those strategies consisting of an ESS are evolutionarily stable maxima on the adaptive landscape [4]. Here we adopt this definition of ESS.

In the following, we first introduce Darwinian dynamics and the extended concept of ESS. Then we analyze these three kinds of PGGs in this context. After the relatively simple linear and sigmoid PGGs are analyzed, the threshold PGG, which is not continuously differentiable so that the  $G$ -function approach cannot be directly

applied to, is approximated by analyzing a class of PGGs with the structure of power functions.

### The $G$ -function Approach

The  $G$ -function approach is mainly developed by Vincent, Brown, and their coauthors [4,13,14,16]. We begin with introducing the fitness-generating function ( $G$ -function). Assume that there are  $s$  populations, and that the  $i$ -th population adopts the strategy  $u_i$  and its frequency is  $p_i \in \mathcal{P} = [0,1]$ . All strategies  $u_i$ 's are limited in the evolutionarily feasible set  $\mathcal{U}$ . We set  $\mathbf{u} = [u_1, u_2, \dots, u_s] \in \mathcal{U}^s$  and  $\mathbf{p} = [p_1, p_2, \dots, p_s] \in \mathcal{P}^s$ . The  $G$ -function  $G(v, \mathbf{u}, \mathbf{p})$  represents the fitness of the  $i$ -th population when the virtual variable  $v \in \mathcal{U}$  is replaced with  $u_i$ .

Darwinian dynamics consist of population dynamics and strategy dynamics. In terms of the  $G$ -function  $G(v, \mathbf{u}, \mathbf{p})$ , the population dynamics are given by

$$\dot{p}_i = p_i [G(v, \mathbf{u}, \mathbf{p}) - \bar{G}], \quad (1)$$

where

$$\bar{G} = \sum_{i=1}^s p_i G(v, \mathbf{u}, \mathbf{p})|_{v=u_i}. \quad (2)$$

When strategies  $u_i$ 's do not evolve with time, they are equivalent to the replicator dynamics [19,20]. The strategy dynamics are given by

$$\dot{u}_i = h \frac{\partial G(v, \mathbf{u}, \mathbf{p})}{\partial v} \Big|_{v=u_i}, \quad (3)$$

where  $h$  is a positive factor that influences the speed of the evolution of strategies [16]. In the special case that one extant strategy is invaded by one rare mutant strategy, they reduce to the adaptive dynamics [14,18,21,22].

A non-trivial equilibrium point  $\mathbf{p}^* = [p_1^*, \dots, p_s^*] \in \mathcal{P}^s$  (reorder the indexes if necessary) is called an *ecologically stable equilibrium* point, if it satisfies that

$$p_i^* > 0 \quad \text{with} \quad [G(v, \mathbf{u}, \mathbf{p}) - \bar{G}]_{v=u_i, \mathbf{p}=\mathbf{p}^*} = 0, \quad (4a)$$

$$\text{for } i = 1, \dots, \sigma,$$

$$p_i^* = 0, \quad \text{for } i = \sigma + 1, \dots, s, \quad (4b)$$

and that every trajectory starting from a point which is in  $\mathcal{P}^s$  and near  $\mathbf{p}^*$  remains in  $\mathcal{P}^s$  for all time and converges to  $\mathbf{p}^*$  as time approaches infinity. The strategies corresponding to  $\mathbf{p}^*$  is denoted by  $\mathbf{u}^* = [\mathbf{u}_c^*, \mathbf{u}_m^*]$ , where

$$\mathbf{u}_c^* = [u_1^*, \dots, u_\sigma^*], \quad (5a)$$

$$\mathbf{u}_m^* = [u_{\sigma+1}^*, \dots, u_s^*]. \quad (5b)$$

The coalition of strategies  $\mathbf{u}_c^* \in \mathcal{U}^\sigma$  is defined as an *evolutionarily stable strategy* (ESS), if  $\mathbf{p}^*$  is an ecologically stable equilibrium point for any  $\mathbf{u}_m^* \in \mathcal{U}^{s-\sigma}$ . The *adaptive landscape* is simply a plot of  $[G(v, \mathbf{u}, \mathbf{p}) - \bar{G}]$  versus the virtual variable  $v$  with  $\mathbf{u}$  and  $\mathbf{p}$  fixed. The *ESS Maximum Principle* [13] states that

$[G(v, \mathbf{u}, \mathbf{p}) - \bar{G}]_{\mathbf{u}=\mathbf{u}^*, \mathbf{p}=\mathbf{p}^*}$  must take on its maximum value, 0, as a function of  $v \in \mathcal{U}$  at  $v = u_1^*, \dots, u_\sigma^*$ .

Here we assume that the evolution of strategy is slower than that of population (but in all of the following invasion simulations we do not make this assumption), and focus on the ESS coalition of one strategy where  $\mathbf{u}_c^* = u_1^*$  and  $p_1^* = 1$ . On the adaptive landscape, a stable minimum indicates an evolutionary branching point. The population which evolves to branching points may diverge into two separate populations or species with distinct strategies [18,22]. Both unstable maxima and unstable minima are repelling points, and they should not be observed in nature [15]. An ESS is an global fitness maximum and convergently stable [14].

In the interior of  $\mathcal{U}$ , a necessary condition for  $u_1^*$  to resist the invasion of rare mutant strategies is given by

$$\frac{\partial G(v, u_1^*, p_1^*)}{\partial v} \Big|_{v=u_1^*} = 0, \quad (6a)$$

$$\frac{\partial^2 G(v, u_1^*, p_1^*)}{\partial v^2} \Big|_{v=u_1^*} < 0. \quad (6b)$$

A necessary condition for the convergence stability of  $u_1^*$  is given by

$$\left[ \frac{\partial^2 G(v, u_1^*, p_1^*)}{\partial v^2} + \frac{\partial^2 G(v, u_1^*, p_1^*)}{\partial u_1^* \partial v} \right]_{v=u_1^*} < 0. \quad (7)$$

The linear PGG is played in a group of  $n$  interacting members. Each member is endowed with  $c$  units of utility, and they have to decide how much to invest in the public project. The total units of utility invested in the public project is multiplied by a positive number  $r$  and then split evenly among all members. If  $r \geq n$ , no member will lose anything no matter how much he invests. If  $r \leq 1$ , no member can gain more no matter how much he invests. So the number  $r$  is restricted between one and  $n$ . Group members benefit most when all cooperate, but each has an incentive to contribute nothing because every invested unit of utility only returns  $r/n$  units of utility and thus cooperation incurs cost  $c(1 - r/n)$  to himself. So the group will no doubt end up all members contributing nothing when they get experienced and the benefit of the public project is forgone. This is the dilemma all group members face. The interests of individuals totally contradict the interest of the group.

From now on we set  $c = 1$  with no loss of generality, since it has no effect on the nature of the dilemma. We subsequently apply this  $G$ -function approach to the aforementioned three kinds of PGGs, so as to analyze the dependence of cooperation levels on the structures of Public Goods.

For the PGG, if the populations are evolutionarily stable in the evolutionarily feasible set  $\mathcal{U} = [0,1]$ , the expected contribution from any random group member is  $\sum_{i=1}^{\sigma} p_i u_i$ . In a group of  $n$  members, if the focal member decides to contribute  $v \in \mathcal{U}$ , then the average contribution  $A_\sigma(v)$  is given by

$$A_\sigma(v) = \frac{1}{n} \left[ v + (n-1) \sum_{i=1}^{\sigma} p_i u_i \right]. \quad (8)$$

Thus the return from the public good for the focal member is  $rg[A_\sigma(v)]$ , and the  $G$ -function is given by

$$G(v, \mathbf{u}, \mathbf{p}) = rg[A_\sigma(v)] - v, \tag{9}$$

where the function  $g(x)$  is supposed to represent the structure of the public good (Fig. 1).

**The Linear PGG**

In the special case of the linear PGG of our interest here (Fig. 1), we set

$$g(x) = g_l(x) = x, \tag{10}$$

and thus the  $G$ -function is

$$G(v, \mathbf{u}, \mathbf{p}) = rA_\sigma(v) - v. \tag{11}$$

It follows that

$$\frac{\partial G(v, \mathbf{u}, \mathbf{p})}{\partial v} \equiv \frac{r}{n} - 1 < 0, \tag{12}$$

which is independent of the composition of the population. Group members can always benefit more by reducing their contributions, so there exists no ESS in the interior of  $[0,1]$ .

However, this also gives us a hint that contributing nothing, where  $u_1^* = 0$  and  $p_1^* = 1$ , is the only possible ESS. Considering that the adaptive landscape

$$[G(v, u_1^*, p_1^*) - \bar{G}]_{u_1^*=0, p_1^*=1} = \left(\frac{r}{n} - 1\right)v \tag{13}$$

reaches its global maximum, 0, in  $[0,1]$  when  $v=0$  (Fig. 2), contributing nothing is surely an ESS for the linear PGG.

Similarly, we can conclude that another boundary value of  $[0,1]$ , contributing all, where  $u_1^* = 1$  and  $p_1^* = 1$ , is not an ESS, since the adaptive landscape

$$[G(v, u_1^*, p_1^*) - \bar{G}]_{u_1^*=1, p_1^*=1} = \left(1 - \frac{r}{n}\right)(1 - v) \tag{14}$$

reaches its global minimum, 0, in  $[0,1]$  when  $v=1$  (Fig. 2).

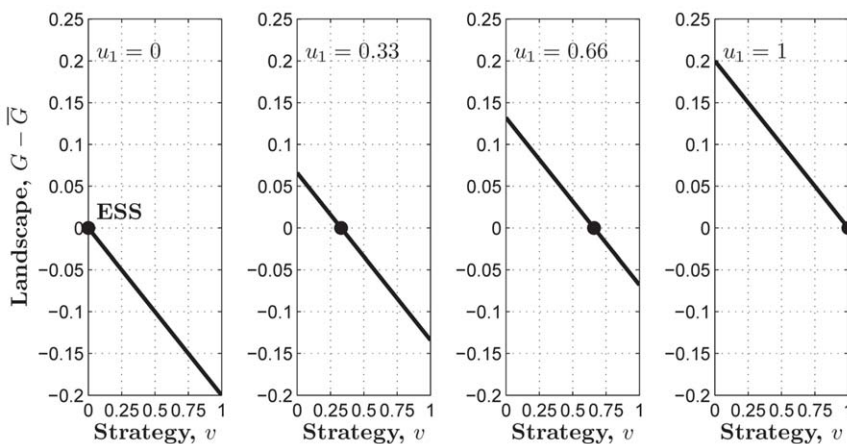

**Figure 2. The adaptive landscapes in the linear PGG.**  $u_1 = 0$  is an ESS which sits at the top of the adaptive landscape. Parameters:  $u_1 = 0, 0.33, 0.66,$  and  $1; n = 10;$  and  $r = 8.$   
doi:10.1371/journal.pone.0025496.g002

A simulation of altruistic cooperators who contribute all (i.e.,  $v=1$ ) invading the population of defectors who contribute nothing (i.e.,  $v=0$ ) is shown in Fig. 3. The result shows that the ESS  $v=0$  is rather robust against invasion. Yet this contradicts the fact that the mean contributions usually end up with between 40% and 60% in experiments [9].

**The Sigmoid PGG**

In the special case of the sigmoid PGG (Fig. 1), we set

$$g(x) = g_s(x) = \sin^2\left(\frac{\pi}{2}x\right). \tag{15}$$

Other functions with similar properties are of course possible, but not explored here for simplicity. Thereby the  $G$ -function is simplified as

$$G(v, \mathbf{u}, \mathbf{p}) = r \sin^2\left[\frac{\pi}{2}A_\sigma(v)\right] - v. \tag{16}$$

We examine the one-strategy ESS (coalition of one strategy); that is,  $\sigma = 1$ . When  $\mathbf{u}_c^* = u_1^*$  and  $p_1^* = 1$ , the  $G$ -function (Fig. 4) is

$$G(v, u_1^*, p_1^*) = r \sin^2\left[\frac{\pi}{2}A_1(v)\right] - v = r \sin^2\left\{\frac{\pi}{2n}[v + (n-1)u_1^*]\right\} - v. \tag{17}$$

It follows that

$$\begin{aligned} \left.\frac{\partial G(v, u_1^*, p_1^*)}{\partial v}\right|_{v=u_1^*} &= \frac{\pi r}{2n} \sin[\pi A_1(u_1^*)] - 1 \\ &= \frac{\pi r}{2n} \sin(\pi u_1^*) - 1. \end{aligned} \tag{18}$$

If  $r < \frac{2n}{\pi}$ ,  $\frac{\partial G(v, u_1^*, p_1^*)}{\partial v} < 0$ . We can verify that  $v=0$  is the global maximum in  $[0,1]$  of the adaptive landscape

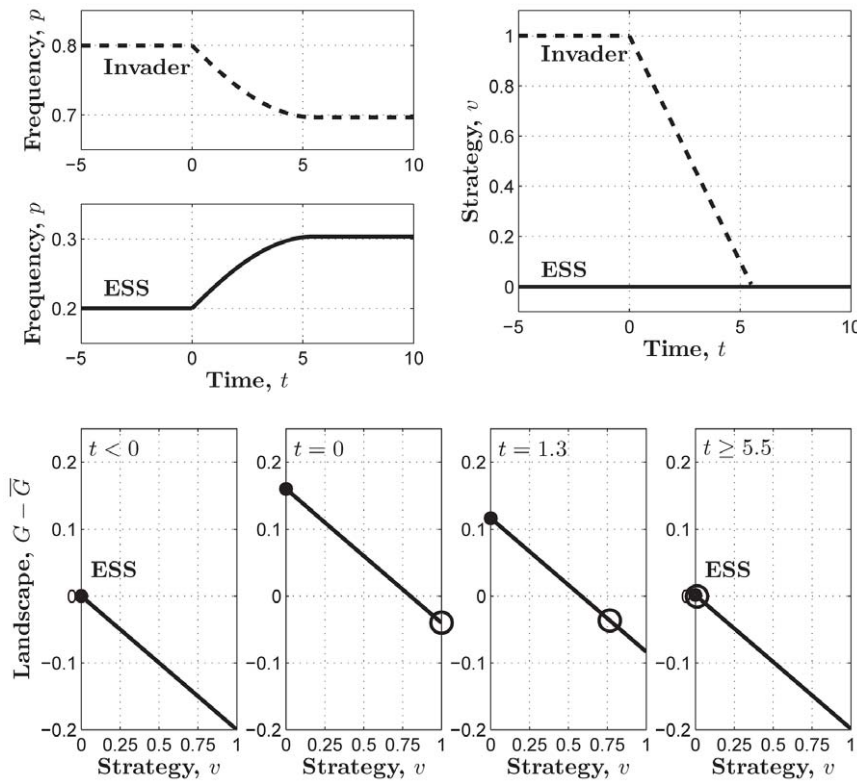

**Figure 3. An invasion simulation of Darwinian dynamics of the linear PGG. (Upper-left)** Evolution of the frequencies of the ESS and the invader strategy starting from 20% and 80% respectively. **(Upper-right)** Evolution of the ESS and the invader strategy starting from  $ESS=0$  and  $Invader=1$  and ending up with the latter evolving to the former. **(Lower)** Evolution of the adaptive landscape and the two strategies:  $t < 0$  (i.e., before the invasion happens),  $ESS=0$  is the global maximum and  $Invader=1$  being the global minimum;  $t=0$  (i.e., the invasion happens), the adaptive landscape is elevated with  $ESS=0$  still being the global maximum and  $Invader=1$  being the global minimum;  $t=1.3$ , the invader strategy climbs up with the adaptive landscape going down;  $t \geq 5.5$ , the invader strategy coincides with  $ESS=0$  and reaches the top of the adaptive landscape, which falls back to the state before the invasion happens. Parameters:  $n=10$ ,  $r=8$ , and  $h=0.9$ . doi:10.1371/journal.pone.0025496.g003

$$[G(v, u_{1,2}^*, p_1^*) - \bar{G}]_{u_1^*=0, p_1^*=1} = r \sin^2\left(\frac{\pi}{2n} v\right) - v. \quad (19)$$

Hence, if  $r < \frac{2n}{\pi}$ , contributing nothing is also an ESS for the sigmoid PGG, just as in the case of the linear PGG.

When  $r \geq \frac{2n}{\pi}$ , the equation  $\frac{\partial G(v, u_{1,2}^*, p_1^*)}{\partial v} \Big|_{v=u_1^*} = 0$  has two solutions in  $[0, 1]$ :

$$u_{1,1}^* = \frac{1}{\pi} \arcsin\left(\frac{2n}{\pi r}\right), \quad (20)$$

and

$$u_{1,2}^* = 1 - \frac{1}{\pi} \arcsin\left(\frac{2n}{\pi r}\right) \geq \frac{1}{2}. \quad (21)$$

We can identify  $u_{1,2}^*$  as an ESS candidate by verifying the following two conditions,

$$\begin{aligned} \frac{\partial^2 G(v, u_{1,2}^*, p_1^*)}{\partial v^2} \Big|_{v=u_{1,2}^*} &= \frac{\pi^2 r}{2n^2} \cos[\pi A_1(u_{1,2}^*)] \\ &= \frac{\pi^2 r}{2n^2} \cos(\pi u_{1,2}^*) < 0, \end{aligned} \quad (22)$$

and

$$\begin{aligned} \frac{\partial^2 G(v, u_{1,2}^*, p_1^*)}{\partial v^2} + \frac{\partial^2 G(v, u_{1,2}^*, p_1^*)}{\partial u_{1,2}^* \partial v} \Big|_{v=u_{1,2}^*} \\ = \frac{\pi^2 r}{2n} \cos[\pi A_1(u_{1,2}^*)] = \frac{\pi^2 r}{2n} \cos(\pi u_{1,2}^*) < 0. \end{aligned} \quad (23)$$

Similarly, we can show that  $u_{1,1}^*$  is an unstable fitness minimum. Hence there exists a stable state of the population contributing  $u_{1,2}^*$ , which is more than half, if the return rate  $r$  is relatively high.

A simulation of defectors who contribute nothing (i.e.,  $v=0$ ) invading the population of individuals who play the ESS (i.e.,  $v=u_{1,2}^*$ ) is shown in Fig. 5. The result shows that the ESS is surely able to resist the invasion.

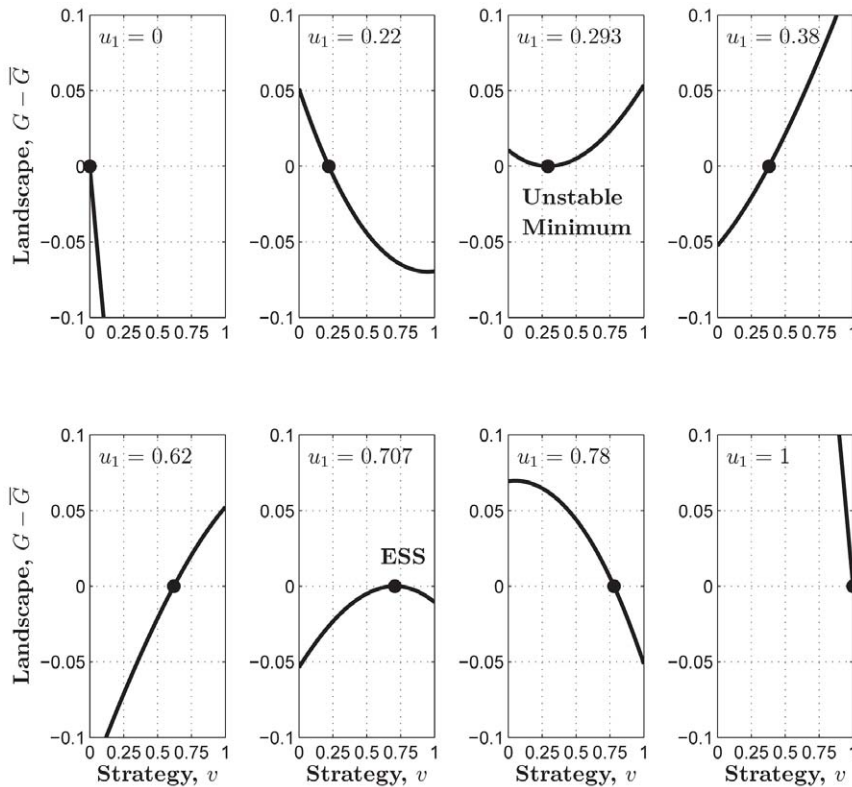

**Figure 4. The adaptive landscapes in the sigmoid PGG.**  $u_1 = 0.707$  is an ESS which sits at the top of the adaptive landscape.  $u_1 = 0.293$  is an unstable minimum which sits at the bottom of the adaptive landscape. Parameters:  $u_1 = 0, 0.22, 0.293, 0.38, 0.62, 0.707, 0.78,$  and  $1$ ;  $n = 10$ ; and  $r = 8$ . doi:10.1371/journal.pone.0025496.g004

**The Threshold PGG**

For the special case of the threshold PGG (Fig. 1), we set

$$g(x) = g_i(x) = \begin{cases} 0, & \text{if } 0 \leq x < \frac{1}{2}, \\ 1, & \text{if } \frac{1}{2} \leq x \leq 1. \end{cases} \quad (24)$$

Yet the discontinuity of  $g_i(x)$  inhibits the application of Darwinian dynamics to our research into the process of evolution. Instead, we adopt a class of power functions  $g_k(x)$ , where  $k = 1, 2, \dots$ , to approach function  $g_i(x)$  (Fig. 6); that is,

$$g_i(x) \approx \lim_{k \rightarrow \infty} g_k(x) = \lim_{k \rightarrow \infty} \frac{1}{2} [(2x - 1)^{\frac{1}{2k+1}} + 1]. \quad (25)$$

Other functions with similar properties are of course possible, but not explored here for simplicity. Hence the  $G$ -function can be expressed as

$$G(v, \mathbf{u}, \mathbf{p}) = \frac{r}{2} \{ [2A_\sigma(v) - 1]^{\frac{1}{2k+1}} + 1 \} - v. \quad (26)$$

We still focus on the one-strategy ESS where  $\sigma = 1$ . When  $\mathbf{u}_c^* = u_1^*$  and  $p_1^* = 1$ , the adaptive landscape (Fig. 6) is

$$\begin{aligned} G(v, u_1^*, p_1^*) &= \frac{r}{2} \{ [2A_1(v) - 1]^{\frac{1}{2k+1}} + 1 \} - v \\ &= \frac{r}{2} \left\{ \left[ \frac{2}{n} (v + (n-1)u_1^*) - 1 \right]^{\frac{1}{2k+1}} + 1 \right\} - v. \end{aligned} \quad (27)$$

It follows that

$$\begin{aligned} \frac{\partial G(v, u_1^*, p_1^*)}{\partial v} \Big|_{v=u_1^*} &= \frac{r}{(2k+1)n} [2A_1(u_1^*) - 1]^{-\frac{2k}{2k+1}} - 1 \\ &= \frac{r}{(2k+1)n} (2u_1^* - 1)^{-\frac{2k}{2k+1}} - 1. \end{aligned} \quad (28)$$

The equation  $\frac{\partial G(v, u_1^*, p_1^*)}{\partial v} \Big|_{v=u_1^*} = 0$  also has two solutions in  $[0, 1]$ :

$$u_{1,1}^* = \frac{1}{2} - \frac{1}{2} \left[ \frac{r}{(2k+1)n} \right]^{(1+\frac{1}{2k})}, \quad (29)$$

and

$$u_{1,2}^* = \frac{1}{2} + \frac{1}{2} \left[ \frac{r}{(2k+1)n} \right]^{(1+\frac{1}{2k})}. \quad (30)$$

We can identify  $u_{1,2}^*$  as an ESS candidate by verifying the following two conditions,

$$\begin{aligned} \frac{\partial^2 G(v, u_{1,2}^*, p_1^*)}{\partial v^2} \Big|_{v=u_{1,2}^*} &= -\frac{4kr}{(2k+1)^2 n^2} [2A_1(u_{1,2}^*) - 1]^{-(1+\frac{2k}{2k+1})} \\ &= -\frac{4kr}{(2k+1)^2 n^2} (2u_{1,2}^* - 1)^{-(1+\frac{2k}{2k+1})} < 0, \end{aligned} \quad (31)$$

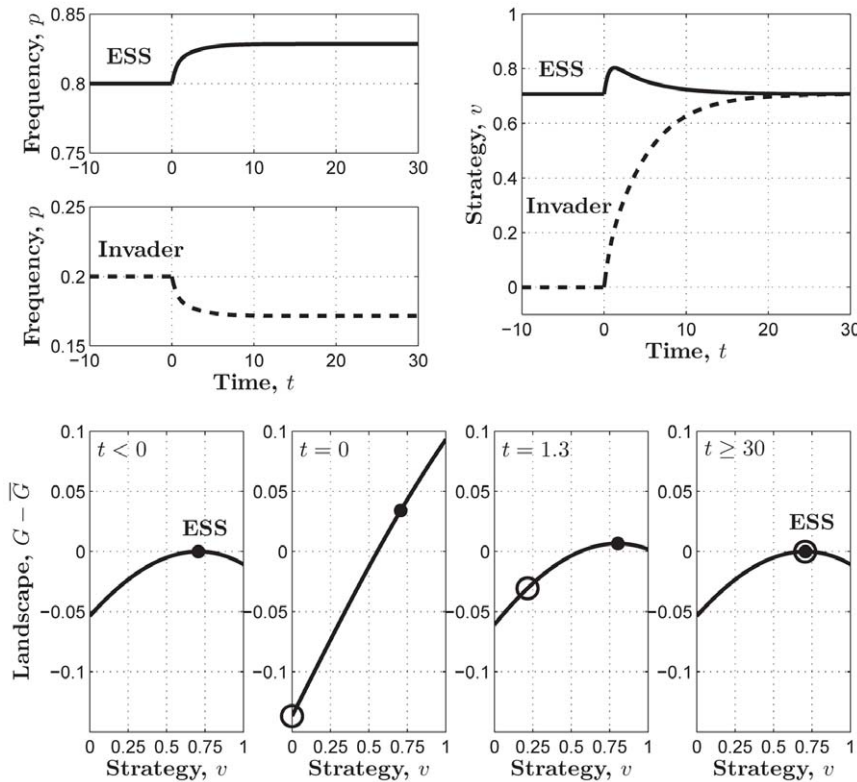

**Figure 5. An invasion simulation of Darwinian dynamics in the sigmoid PGG.** (Upper-left) Evolution of the frequencies of the ESS and the invader strategy starting from 80% and 20% respectively. (Upper-right) Evolution of the ESS and the invader strategy starting from  $ESS=0.707$  and  $Invader=0$  and ending up with the latter evolving to the former. (Lower) Evolution of the adaptive landscape and the two strategies:  $t < 0$  (i.e., before the invasion happens),  $ESS=0.707$  is the global maximum;  $t=0$  (i.e., the invasion happens), the adaptive landscape is reshaped with  $ESS=0.707$  sitting at the left of the global maximum and  $Invader=0$  being the global minimum;  $t=1.3$ , the two strategies climb up so that the adaptive landscape is reshaped with the global maximum sitting between the two strategies;  $t \geq 30$ , the two strategies coincide and reach the top, at  $ESS=0.707$ , of the adaptive landscape, which falls back to the state before the invasion happens. Parameters:  $n=10$ ,  $r=8$ , and  $h=0.9$ . doi:10.1371/journal.pone.0025496.g005

and

$$\begin{aligned} & \left. \frac{\partial^2 G(v, u_{1,2}^*, p_1^*)}{\partial v^2} + \frac{\partial^2 G(v, u_{1,2}^*, p_1^*)}{\partial u_{1,2}^* \partial v} \right|_{v=u_{1,2}^*} \\ &= -\frac{4kr}{(2k+1)^2 n} [2A_1(u_{1,2}^*) - 1]^{-(1+\frac{2k}{2k+1})} \quad (32) \\ &= -\frac{4kr}{(2k+1)^2 n} (2u_{1,2}^* - 1)^{-(1+\frac{2k}{2k+1})} < 0. \end{aligned}$$

Similarly, we can show that  $u_{1,1}^*$  is an unstable fitness minimum. With increasing  $k$ ,  $u_{1,1}^*$  monotonically decreases, whereas  $u_{1,2}^*$  monotonically increases, and both approach the threshold value  $1/2$  (Fig. 6).

Fig. 6 also shows that, in contrast to the ESS in the sigmoid PGG, here just on the left side of  $u_{1,2}^*$  there exists a global minimum, which makes the ESS is rather fragile. This point is fully exposed in Fig. 7, where only 0.1% invaders of defectors who contribute nothing (i.e.,  $v=0$ ) drove the whole population to the stable state of contributing nothing with a much faster speed relative to that in Fig. 3 or Fig. 5. Hence the threshold

PGG basically does not have much advantage over the linear PGG.

### Results and Discussion

In summary, by adopting Darwinian dynamics, we have explored the significant effect of nonlinearity of the structures of public goods on the evolution of cooperation within the well-mixed population. The threshold PGG does not have much advantage over the linear PGG, whereas in the sigmoid PGG there exists a one-strategy ESS of the whole population contributing more than half. This suggests that the sigmoid PGG might be a more proper mathematical model for the research of the evolution of cooperation within the well-mixed population, and thereby may release researchers from the shackles of the linear or threshold PGG.

In contrast to most work in which replicator dynamics or adaptive dynamics were applied to the evolution of cooperation in social dilemmas [12,22], here we adopt Darwinian dynamics mainly developed by Vincent, Brown, and their coauthors, which simultaneously consider the evolution of populations and strategies on a continuous adaptive landscape [4,13,14,16]. In Darwinian dynamics, the concept of ESS is extended as a coalition of strategies that is both convergent-stable and resistant to invasion,

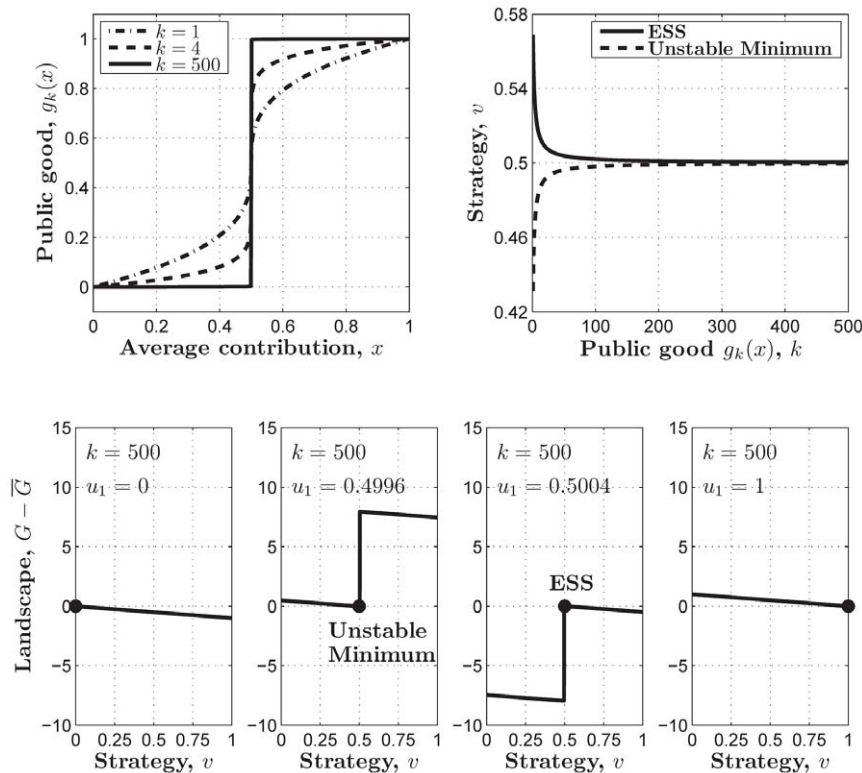

**Figure 6. The approximate representative of the threshold PGG by a class of power functions. (Upper-left)**  $g_k(x) = [(2x - 1)^{\frac{1}{k+1}} + 1]/2$  where  $k=1, 4$ , and  $500$ . **(Upper-right)** the ESS and the unstable minimum as the functions of parameter  $k$ . They are getting closer and closer with increasing  $k$ . **(Lower)** the adaptive landscapes when  $k=500$ , and  $u_1=0, 0.4996, 0.5004$ , and  $1$ .  $u_1=0.5004$  is an ESS which sits at the top of the adaptive landscape.  $u_1=0.4996$  is an unstable minimum at the bottom of the adaptive landscape. Parameters:  $n=10$ , and  $r=8$ . doi:10.1371/journal.pone.0025496.g006

whereas the original definition of ESS by Maynard Smith and Price might be unattainable through strategy dynamics by natural selection. This well-developed framework provides us with another wonderful mathematical tool for the research related to natural selection.

To our knowledge the only systematic theoretical analysis until now of the effect of nonlinearity of the structures of public goods on the evolution of cooperation is [12], in which a series of functions  $1/(1+e^{-kx})$  were adopted to explore the sigmoid PGG and their limit function when  $k \rightarrow \infty$  was used to approach the threshold PGG, and the authors concluded that the threshold PGG is a good approximation of any public goods games in which the public good is a nonlinear function of the number of cooperators. However, compared to Eqn. (28) we adopt here,  $1/(1+e^{-kx})$  is not a good approximation due to its asymptotic nature. For example, this series of functions cannot represent full cooperation (or full defection) even though all individuals are cooperators (or defectors).

Both in the sigmoid PGG approximated by  $1/(1+e^{-kx})$  and in the threshold PGG approximated either by  $\lim_{k \rightarrow \infty} 1/(1+e^{-kx})$  or by Eqn. (25), the ESS (note the different definition of ESS in our analysis from [12]) is accompanied by an unstable cooperation level (Figs. 6 and 7), which makes the ESS is rather fragile. In contrast, in the sigmoid PGG approximated here by Eqn. (15) the ESS is the only global extreme point in the interior of the evolutionarily feasible set  $\mathcal{U}=[0,1]$  (Figs. 4 and 5). This suggests that the sigmoid PGG might be a more proper model for the

evolution of cooperation within the well-mixed population, in that it hosts a non-trivial evolutionarily stable cooperation level when the return rate is relatively high, whereas the linear or threshold PGG never does.

Note that our results are reached within the well-mixed population. There exist different possibilities if we adopt other assumptions on the population, the group size, or the structure of the PGG. For example, within structured populations with different group sizes, the coexistence of cooperation and defection is possible even for the linear PGG due to noise underlying strategy adoptions [23]. The exploration of the linear PGG that requires a minimum collective investment to ensure any benefit shows that decisions within small groups under high risk significantly raise the chances of coordinating actions [24]. In addition, the relative size of the threshold value of the threshold PGG might also affect the evolution of cooperation within the structured population [25].

However, our work does show the significant effect of nonlinearity of the structures of public goods on the evolution of cooperation within the well-mixed population. Actually, when  $x$  increases from 0 to 1, the slope of the S-shaped function  $g(x)$  goes through a process from accelerating to decelerating. Simulations show that this property of  $g(x)$  plays a key role for the existence of a robust ESS in the PGG within a well-mixed population. Naturally, an interesting future work might be to search for the optimal structure of public goods in the sense that complete cooperation is a robust global ESS in the PGG with this kind of structure, and the way to implement it in the real world.



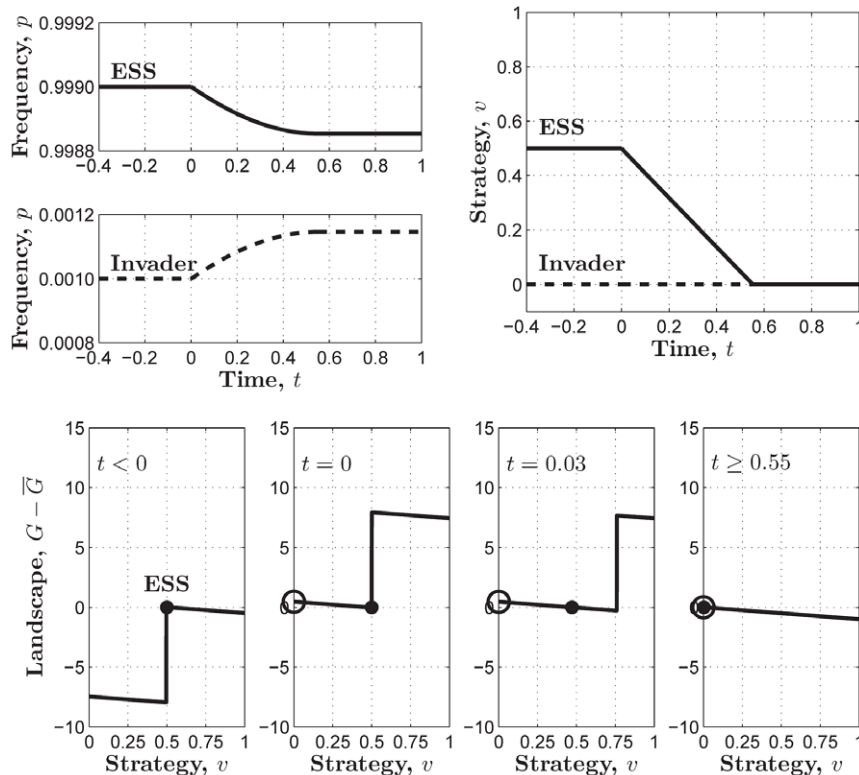

**Figure 7. An invasion simulation of Darwinian dynamics in the threshold PGG which is approximated by  $g_k(x) = [(2x-1)^{\frac{1}{k-1}} + 1]/2$  where  $k=500$ .** (Upper-left) Evolution of the frequencies of the ESS and the invader strategy starting from 99.9% and 0.1% respectively. (Upper-right) Evolution of the ESS and the invader strategy starting from  $ESS=0.5004$  and  $Invader=0$  and ending up with the former evolving to the latter. (Lower) Evolution of the adaptive landscape and the two strategies:  $t < 0$  (i.e., before the invasion happens),  $ESS=0.5004$  is the global maximum;  $t=0$  (i.e., the invasion happens), the adaptive landscape is elevated with  $ESS=0.5004$  being the global minimum and  $Invader=0$  being the local maximum;  $t=0.03$ , the “ESS” climbs up towards the invader strategy with the latter keeping sitting at the local maximum of the reshaped adaptive landscape;  $t \geq 0.55$ , the “ESS” coincides with  $Invader=0$  and reaches the top of the reshaped adaptive landscape, which means the success of the invader strategy and the failure of the “ESS”. Parameters:  $n=10$ ,  $r=8$ , and  $h=0.9$ . doi:10.1371/journal.pone.0025496.g007

## Acknowledgments

The comments and suggestions of the reviewers are gratefully acknowledged.

## References

- Axelrod R (2006) The Evolution of Cooperation: Revised Edition. Cambridge-Mass: Basic Books.
- Maynard Smith J, Szathmáry E (1995) The Major Transitions in Evolution. Freeman, Oxford.
- Frank SA (1998) Foundations of Social Evolution. Princeton New Jersey: Princeton University Press.
- Vincent TL, Brown JS (2005) Evolutionary Game Theory, Natural Selection, and Darwinian Dynamics. Cambridge, UK: Cambridge University Press.
- Nowak MA (2006) Evolutionary Dynamics: Exploring the Equations of Life. Belknap Press of Harvard University Press, Cambridge, Mass.
- Hardin G (1968) The tragedy of the commons. Science 162: 1243–1248.
- Kollock P (1998) Social dilemmas: The anatomy of cooperation. Annu Rev Sociol 24: 183–214.
- Abele S, Stasser G (2005) Continuous versus step-level public good games: A critical assessment of a methodological research tradition. ERIM Report Series Research in Management ERS-2005-015-ORG.
- Henrich J, Boyd R, Bowles S, Camerer C, Fehr E, et al. (2005) “Economic man” in cross-cultural perspective: Behavioral experiments in 15 small-scale societies. Behav Brain Sci 28: 795–855.
- Heckathorn DD (1996) The dynamics and dilemmas of collective action. Am Socio Rev 61: 250–277.
- Szolnoki A, Perc M (2010) Impact of critical mass on the evolution of cooperation in spatial public goods games. Phys Rev E 81: 057101.
- Archetti M, Scheuring I (2011) Coexistence of cooperation and defection in public goods games. Evolution 65: 1140–1148.
- Vincent TL, Van MV, Goh BS (1996) Ecological stability, evolutionary stability and the ESS maximum principle. Evol Ecol 10: 567–591.
- Cohen Y, Vincent T, Brown J (1999) A  $G$ -function approach to fitness minima, fitness maxima, evolutionarily stable strategies and adaptive landscapes. Evol Ecol Res 1: 923–942.
- McGill BJ, Brown JS (2007) Evolutionary game theory and adaptive dynamics of continuous traits. Annu Rev Ecol Syst 38: 403–435.
- Brown JS, Vincent TL (2008) Evolution of cooperation with shared costs and benefits. Proc R Soc B 275: 1985–1994.
- Maynard Smith J, Price GR (1973) The logic of animal conflict. Nature 246: 15–18.
- Geritz SAH, Kisdi E, Meszéna G, Metz JAJ (1998) Evolutionarily singular strategies and the adaptive growth and branching of the evolutionary tree. Evol Ecol 12: 35–57.
- Schuster P, Sigmund K (1983) Replicator dynamics. J Theor Biol 100: 533–538.
- Traulsen A, Claussen JC, Hauert C (2005) Coevolutionary dynamics: from finite to infinite populations. Phys Rev Lett 95: 238701.
- Geritz SAH, Metz JAJ, Kisdi E, Meszéna G (1997) Dynamics of adaptation and evolutionary branching. Phys Rev Lett 78: 2024–2027.
- Doebeli M, Hauert C, Timothy K (2004) The evolutionary origin of cooperators and defectors. Science 306: 859–862.
- Szolnoki A, Perc M, Szabó G (2009) Topology-independent impact of noise on cooperation in spatial public goods games. Phys Rev E 80: 056109.
- Santos FC, Pacheco JM (2011) Risk of collective failure provides an escape from the tragedy of the commons. Proc Natl Acad Sci USA 108: 10421–10425.
- Wu Z, Holme P (2010) Local interaction scale controls the existence of a nontrivial optimal critical mass in opinion spreading. Phys Rev E 82: 022102.
